# Supplementary material
Source: Research Square preprint supplement (doi:10.21203/rs.3.rs-10176355/v1)
Supplement: Supplementary file 1 [file 14638494733c332f3885b5ee.docx]

TABLE 1: Inclusion and Exclusion Criteria.

| Inclusion Criteria | Exclusion Criteria |
| --- | --- |
| • Age 30–50 years • Systemically healthy (ASA I–II) • Stage II Grade B periodontitis • No recent periodontal therapy or antibiotics • Adherence to oral hygiene instructions | • Allergy to propolis • Smokers or alcoholics • Pregnant or lactating women |

TABLE 2: Comparison of clinical indices between the study and control groups before and after treatment at 3 and 6 months. Data of clinical indices presented as mean and standard deviation.

| Index | Study group | | | | Control group | | | | p-value (intergroup) | | | |
| --- | --- | --- | --- | --- | --- | --- | --- | --- | --- | --- | --- | --- |
|  | baseline | 3-months | 6-months | P-value | baseline | 3-months | 6-months | P-value | baseline | 3-months | 6-months |
| PI | 1.69±0.32A | 0.94±0.14B | 0.94±0.21B | **<0.001*** | 1.70±0.30A | 1.08±0.22B | 1.14±0.15B | **<0.001*** | **0.777ns** | **0.05ns** | **0.004*** |
| GI | 1.79±0.33A | 0.88±0.18B | 0.98±0.24B | **<0.001*** | 1.70±0.17A | 1.26±0.15B | 1.29±0.20B | **<0.001*** | **0.496ns** | **<0.001*** | **<0.002*** |
| PPD | 3.33±0.30A | 2.10±0.23B | 2.19±0.27B | **<0.001*** | 3.36±0.32A | 2.99±0.33B | 3.12±0.28B | **<0.001*** | **0.748ns** | **<0.001*** | **<0.001*** |
| CAL | 2.55±0.37A | 1.53±0.24B | 1.60±0.27B | **<0.001*** | 2.61±0.38A | 2.27±0.35B | 2.39±0.31B | **<0.001*** | **0.706ns** | **<0.001*** | **<0.001*** |

PI: plaque index; GI: gingival index; PPD: probing depth; CAL: clinical attachment loss.

Means followed by different letters are significantly different according to DMRTs.

*, significant at p<0.05, p<0.002, p<0.001, ns non significant at p>0.05.’

TABLE 3: Comparison of PGE2 levels between the study and control groups before and after treatment at 1 and 3 months. Data presented in terms of mean and standard deviation.

| Index | Study group | | | | | Control group | | | | | p-value (intergroup) | | |
| --- | --- | --- | --- | --- | --- | --- | --- | --- | --- | --- | --- | --- | --- |
|  | baseline | 1-months | 3-months | p-value | baseline | | 1-months | 3-months | p-value | baseline | | 1-months | 3-months |
| PGE2 | 316.897±18.055A | 138.493±6.167B | 114.829±8.298C | **<0.001*** | 317.092±21.001A | | 193.801±9.938B | 168.117±9.727C | **<0.001*** | **0.978ns** | | **<0.001*** | **<0.001*** |

Means followed by different letters are significantly different according to DMRTs.

*, significant at p<0.001, ns non significant at p>0.05
