# Supplementary material
Source: Research Square preprint supplement (doi:10.21203/rs.3.rs-10176355/v1)
Supplement: Supplementary file 2 [file d6d3a191f76dd48df41ee6a2.doc]

**CONSORT 2010 Flow Diagram**

**Allocation**

**Analysis**

**Follow-Up**

**Enrollment**

Assessed for eligibility (n= 60 )

Excluded (n= 10 )

  Not meeting inclusion criteria (n= 8)

  Declined to participate (n=6 )

  Other reasons (n= 4 )

Analysed (n= 16 )
 Excluded from analysis (give reasons) (n= 0 )

Lost to follow-up (give reasons) (n= 0)

Discontinued intervention (give reasons) (n= 0 )

Allocated to NSPT + propolis (n= 16 )

 Received allocated intervention (n= 16 )

 Did not receive allocated intervention (give reasons) (n= 0 )

Lost to follow-up (give reasons) (n= 0 )

Discontinued intervention (give reasons) (n= 0 )

Allocated to NSPT (n= 16 )

 Received allocated intervention (n= 16 )

 Did not receive allocated intervention (give reasons) (n= 0 )

Analysed (n= 16 )
 Excluded from analysis (give reasons) (n= 0 )

Randomized (n= 32 )
